# Supplementary material
Source: ML conference proceedings conference paper supplement (https://aclanthology.org/D19-5617)
Supplement: Attachment [file MT_of_Restaurant_Reviews_Appendix.pdf › MT_of_Restaurant_Reviews_Appendix.pdf]

## Appendix

| Corpus    | Emoji | Upper | Spelling |
|-----------|-------|-------|----------|
| 4SQ-test  | 0.17  | 0.14  | 3.3      |
| MTNT-test | 0.02  | 0.18  | 3.8      |

Table 13: Noise comparison between 4SQ-test and MTNT-test (Michel and Neubig, 2018). Emojis, all-uppercase words and spelling + grammar mistakes (according to MS Word) per 100 tokens.

| Model                                    | 4SQ-valid   | MTNT-test   |
|------------------------------------------|-------------|-------------|
| <b>Berard et al. (2019)</b>              |             |             |
| WMT (Inline case)                        | –           | 39.1        |
| + MTNT domain adaptation                 | –           | 44.3        |
| + Ensemble                               | –           | <b>45.7</b> |
| <b>Our models (single)</b>               |             |             |
| WMT (Cased)                              | 24.4        | 39.0        |
| UGC (Cased)                              | 30.3        | 41.5        |
| UGC (Inline case)                        | 29.4        | 41.6        |
| UGC $\oplus$ BT + FT                     | 33.7        | 44.5        |
| UGC $\oplus$ BT $\oplus$ PE + tags       | <b>33.9</b> | <b>44.9</b> |
| Nat noise $\oplus$ BT + FT               | 33.8        | 44.6        |
| Nat noise $\oplus$ BT $\oplus$ PE + tags | 33.5        | <b>44.9</b> |

Table 14: Comparison of our models against the winner of the WMT 2019 Robustness Task on the MTNT test set (similar robustness challenges but different domain). We also give cased BLEU of our models on the 4SQ-valid set. Results on 4SQ-test are shown in the paper.

**Large-Scale monolingual evaluation** We conducted a larger scale monolingual evaluation using Amazon Mechanical Turk (AMT), as reported in Table 15. We evaluated the translations of 1800 test sentences. To filter poor quality work, which occurs frequently in our experience, we also created gold questions by selecting 40 additional sentences for which we built 3 fake translations each, whose ranking was intentionally unambiguous and easy. We created HITs (Human Intelligence Tasks) of 10 sentences each, of which 3 sentences were gold questions. Workers were also required to have at least 98% task approval rate on AMT and 1000 tasks approved. We aimed for 6 submissions per HIT from 6 different workers. Compared to the in-house evaluation, the inter-judge agreement was low (Kappa of 0.15).

| Pairs                   | Win  | Tie  | Loss |
|-------------------------|------|------|------|
| Tags + noise $\gg$ Tags | 1939 | 7414 | 1667 |
| Tags + noise $\gg$ Base | 2718 | 6108 | 2178 |
| Tags + noise $\gg$ GT   | 3008 | 5801 | 2173 |
| Tags $\gg$ Baseline     | 2657 | 6110 | 2225 |
| Tags $\gg$ GT           | 2950 | 5794 | 2234 |
| Baseline $\gg$ GT       | 2205 | 6918 | 1889 |

Table 15: Large-scale Human Evaluation on Amazon Mechanical Turk (“ $\gg$ ” means  $p \leq 0.01$ ). The 4 models *Baseline*, *GT*, *Tags* and *Tags + noise* correspond respectively to rows 2 (UGC with inline case), 3 (Google Translate), 6 (Combination of BT, PE and tags) and 8 (Same as 6 with natural noise) in Table 8.

Both human evaluations agree and are consistent with the BLEU evaluation, except for the impact of natural noise, where the AMT evaluation found a significant improvement.

| Evaluation | # Tasks | # Ties | % Ties | Kappa |
|------------|---------|--------|--------|-------|
| In-house   | 12      | 3588   | 57%    | 0.47  |
| AMT        | 1321    | 65988  | 58%    | 0.15  |

Table 16: Size of the human evaluations. AMT: Amazon Mechanical Turk. The AMT kappa (inter-judge agreement) is very low, while the in-house kappa is moderate.

|          |                                                                                                                                                                                                      |
|----------|------------------------------------------------------------------------------------------------------------------------------------------------------------------------------------------------------|
| SRC      | On s'y sent comme a la maison ! <s> Équipe de serveurs très sympa! <s> Goutez au burger LE Retour d'Hervé, il est a tomber :-)                                                                       |
| REF      | It feels like home!! <s> Team of waiters very nice! <s> Taste the burger LE Retour d'Hervé, it's to die for :-)                                                                                      |
| Type     | Bar, Bistro                                                                                                                                                                                          |
| Location | Paris, FR                                                                                                                                                                                            |
| Rating   | 8.29                                                                                                                                                                                                 |
| SRC      | Je conseille le crumble fraise/rhubarbe CHAUD. <s> C'est délicieux !!                                                                                                                                |
| REF      | I recommend the strawberry/rhubarb crumble HOT. <s> It's delicious!!                                                                                                                                 |
| Type     | Bakery, Breakfast Spot                                                                                                                                                                               |
| Location | Brussels, BE                                                                                                                                                                                         |
| Rating   | 8.88                                                                                                                                                                                                 |
| SRC      | Très bons burgers, cheesecake à tomber par terre.... <s> Sans oublier <NAME>, <NAME> et <NAME> en un mot CHAR-MANTS!                                                                                 |
| REF      | Very good burgers, cheesecake to die for... <s> Not to mention <NAME>, <NAME> and <NAME>: in a word CHAR-MING!                                                                                       |
| Type     | American Restaurant                                                                                                                                                                                  |
| Location | Paris, FR                                                                                                                                                                                            |
| Rating   | -                                                                                                                                                                                                    |
| SRC      | Friterie sympathique collée au Grand Boulevards. <s> On retrouve les incontournables frites belges. <s> Elle sont DELICIEUSESEMENT grosses comme on aiment :) a tester. <s> Ouverture tardive le we. |
| REF      | Friendly chip shop stuck to Grand Boulevards. <s> We find the essential Belgian fries. <s> They are DELICIOUSLY big as we like them :) to test. <s> Late opening on the weekend.                     |
| Type     | Belgian Restaurant, Fast Food Restaurant                                                                                                                                                             |
| Location | Paris, FR                                                                                                                                                                                            |
| Rating   | 7.91                                                                                                                                                                                                 |
| SRC      | Que de bon souvenir , fillet de boeuf au patte. <s> Merci pour l accueil Mr <NAME>                                                                                                                   |
| REF      | Great memories, beef fillet with pasta. <s> Thank you for being so welcoming Mr <NAME>                                                                                                               |
| Type     | Café, Pizza Place                                                                                                                                                                                    |
| Location | Libreville, GA                                                                                                                                                                                       |
| Rating   | 8.21                                                                                                                                                                                                 |
| SRC      | La carte est souvent enrichie. <s> La gérance est top.                                                                                                                                               |
| REF      | The menu is often supplemented. <s> The management is top notch.                                                                                                                                     |
| Type     | Sushi Restaurant                                                                                                                                                                                     |
| Location | Sid'Bou Said, TN                                                                                                                                                                                     |
| Rating   | 7.70                                                                                                                                                                                                 |

Table 17: Examples of challenging examples from 4SQ-PE. We show the full reviews with sentence delimiters (<s>) and metadata. The words that contain typos or that could cause trouble for a regular NMT model are shown in red.

|             |                                                                                             |
|-------------|---------------------------------------------------------------------------------------------|
| SRC         | Le meilleur resto de Belleville, DE LOIN!                                                   |
| REF         | The best restaurant in Belleville, BY FAR!                                                  |
| Cased       | Best restaurant in Belleville, DE LOIN!                                                     |
| Inline case | The best restaurant in Belleville, BY FAR!                                                  |
| SRC         | ESCALOPE DE VEAU MONTAGNARDE à tomber, et à ne plus pouvoir se lever de sa chaise           |
| REF         | ESCALOPE DE VEAU MONTAGNARDE is an absolute knock out and you'll have difficulty recovering |
| Cased       | Falling down and not being able to get up from his chair                                    |
| Inline case | ESCALOPE OF MOUNTAIN CALF to fall, and not be able to rise from his chair                   |

Table 18: Examples of sentences from 4SQ-test with capitalized words, where default (cased) MT gets the translation wrong, and inline case helps.

|               |                                                   |
|---------------|---------------------------------------------------|
| SRC           | <b>Bcp</b> de choix, peut-être Trop :-)           |
| REF           | <b>Plenty</b> of choice, maybe too much of it :-) |
| Inline case   | <b>Bcp</b> of choice, maybe Too much :-)          |
| Natural noise | <b>A lot</b> of choices, maybe Too much :-)       |
| SRC           | Service <b>loooooonnnng</b> .                     |
| REF           | <b>Loooooong</b> wait.                            |
| Inline case   | Service <b>loooooonnnng</b> .                     |
| Natural noise | <b>Long</b> service.                              |

Table 19: Examples of sentences from 4SQ-test with noisy spelling (in red bold), where natural noise helps.

|             |                                                                                        |
|-------------|----------------------------------------------------------------------------------------|
| SRC         | <b>Carte</b> attractive et pas excessive.                                              |
| REF         | Nice <b>menu</b> and not over the top.                                                 |
| Inline case | Attractive and not excessive <b>card</b> .                                             |
| BT + FT     | Attractive <b>menu</b> and not excessive.                                              |
| SRC         | <b>Cuisine</b> pas originale, service passable, mais l'endroit est joli !              |
| REF         | Not very original <b>food</b> , acceptable service, but the place itself is beautiful! |
| Inline case | Not an original <b>kitchen</b> , fair service, but the place is nice!                  |
| BT + FT     | <b>Food</b> not original, service passable, but the place is nice!                     |

Table 20: Examples of sentences from 4SQ-test with polysemous words (in red bold), where domain adaptation helps (with 4SQ-PE fine-tuning and back-translation).

|     |                                                                                                      |                                                                                   |
|-----|------------------------------------------------------------------------------------------------------|-----------------------------------------------------------------------------------|
| SRC | Les frites <b>boff</b> mais leurs burger, une tuerie!                                                | Typo and slang (“bof”)                                                            |
| REF | The fries are <b>meh</b> , but the burgers, to die for!                                              |                                                                                   |
| MT  | The fries are <b>great</b> but their burgers are to die for!                                         |                                                                                   |
| SRC | Le <b>merveilleux</b> du <b>Merveilleux</b> c'est merveilleux...                                     | “merveilleux” is a pastry,<br>“Merveilleux” is a pastry shop<br>(named entity).   |
| REF | The <b>merveilleux</b> at <b>Merveilleux</b> is marvelous...                                         |                                                                                   |
| MT  | The <b>wonderful</b> of the <b>Wonderful</b> it's wonderful...                                       |                                                                                   |
| SRC | La <b>souris d'agneau</b> est délicieuse !                                                           | Dish name (translated literally)                                                  |
| REF | The <b>lamb shank</b> is delicious!                                                                  |                                                                                   |
| MT  | The <b>lamb mouse</b> is delicious!                                                                  |                                                                                   |
| SRC | La quantité 5 raviolis <b>qui se battent</b> pour 12.70 euros.                                       | Idiomatic expression (“qui se<br>battent en duel”)                                |
| REF | Poor quantity, 5 raviolis or so for 12.70 Euros.                                                     |                                                                                   |
| MT  | The quantity 5 dumplings <b>that fight</b> for 12.70 euros.                                          |                                                                                   |
| SRC | Après le <b>palais du facteur</b> nous voici à <b>la halte</b> qui est un restaurant correct.        | Named entities (“Palais Idéal du<br>Facteur Cheval” and “La Halte<br>du Facteur”) |
| REF | After the <b>Palais du Facteur</b> we stopped at <b>La Halte</b> , which is a reasonable restaurant. |                                                                                   |
| MT  | After the <b>mailman's palace</b> here we are at the <b>rest stop</b> which is a decent restaurant.  |                                                                                   |

Table 21: Examples of bad translations by our best model (Noise  $\oplus$  BT  $\oplus$  PE + tags). All examples are from 4SQ-test, except for the last one, which is from SemEval.
